# Supplementary material
Source: MDPI journal article supplement (https://www.mdpi.com/2073-4441/9/12/915)
Supplement: s1 [file s1]

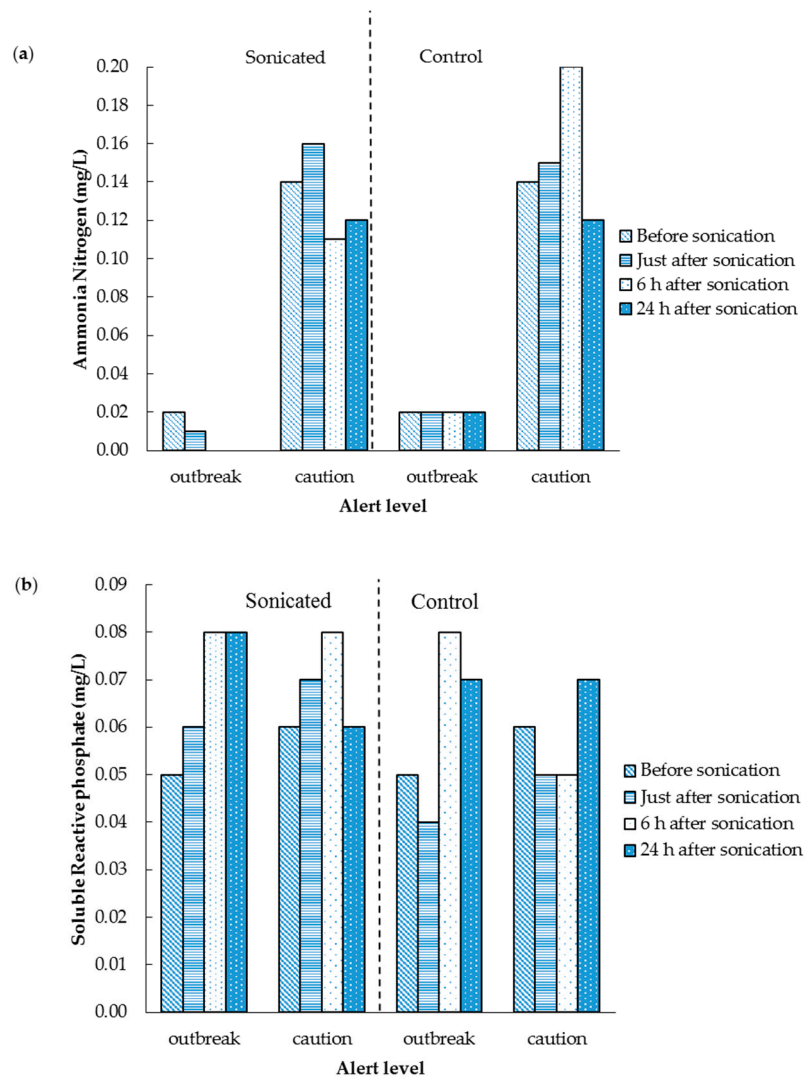

**Figure S1:** Immediate and long-term effect of 15 min sonication on the (a) ammonia-nitrogen, and (b) soluble reactive phosphate (SRP) values of the outbreak and caution level concentration.
